# Supplementary material
Source: Springer Nature journal article supplement (https://www.springermedizin.de/resource/supplementary/12936_2012_2566_MOESM1_ESM.pdf/9543192)

Numbers of adult mosquitoes per house

**Chipula**

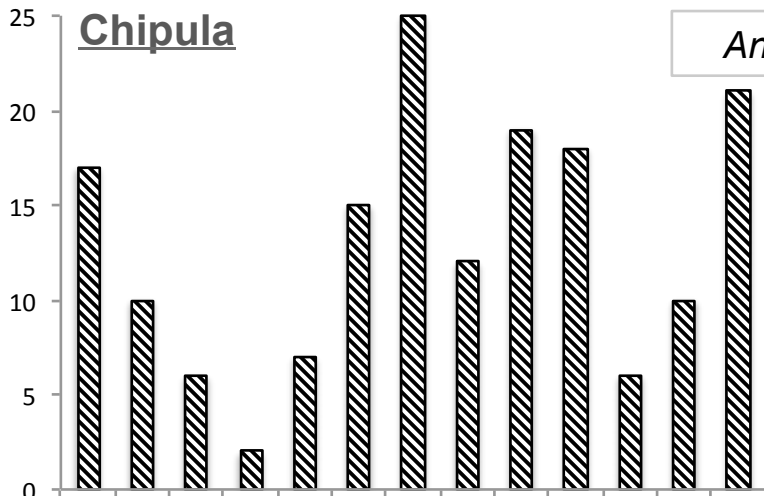

*An. arabiensis*

**Kela**

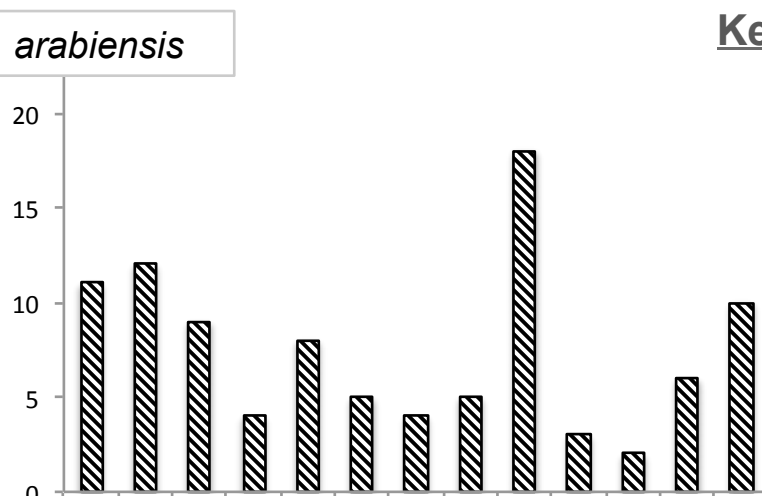

15

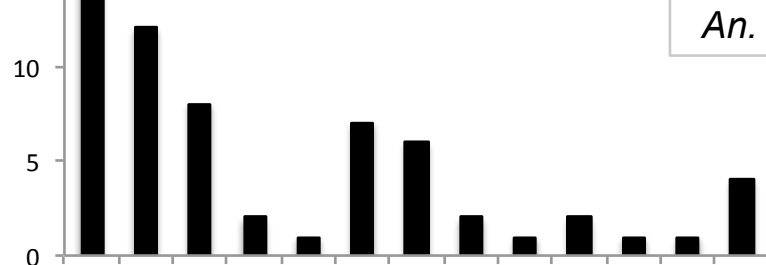

*An. gambiae s.s.*

15

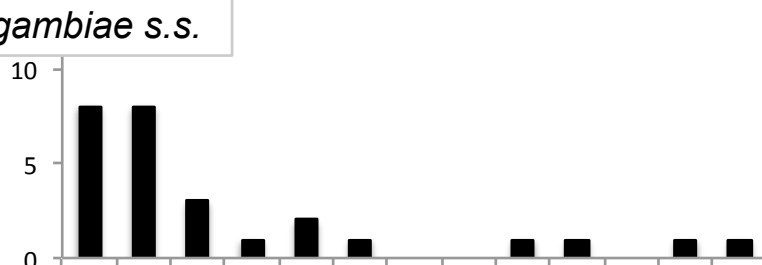

35

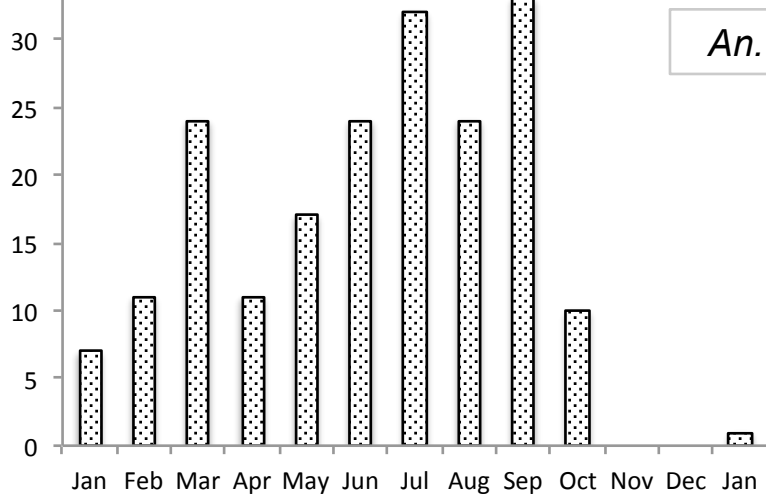

*An. funestus s.l.*

35

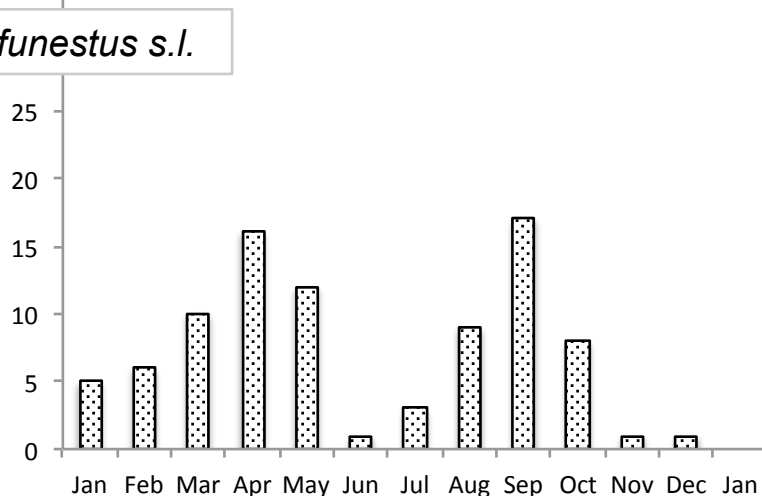

Supplement: MOESM1 [file 9543192]
